# Supplementary material for: Microsatellite loci development and population genetics in Neotropical fish Curimata mivartii (Characiformes: Curimatidae)
Source: PeerJ journal article supplement (doi:10.7717/peerj.5959), 2018-11-13
Supplement: Raw_sequences_reads_27_microsatellite_loci_in_Curimata_mivartii.pdf [file Raw_sequences_reads_27_microsatellite_loci_in_Curimata_mivartii.pdf]

**Locus Cm05**, motif ATCT

>IH3P4PI01E1UIW length=486 xy=1954\_0822 region=1 run=R\_2013\_10\_22\_16\_44\_39\_

ACTATTAACACTTTTACTGTACATCCTGTACGTTTACACTCCTGGACACTATTAAC  
ACTTTACTGTACATCCTGCACGTTTACACTCCTGGACACTATTTAACACTTTACT  
GTACATCCTGTATGTTGCTCTTCTGGACACTATTAACACTTTTCTTAAATATAAC  
TCTTTACACACTGCTATCTATCTATCTATCTATCTATCTATCTATCTATCTA  
TCTATCTATCTATCTATCTATCTTTAGTAGAAAACAGAAGTCAGGTAAAATGTA  
CATAAACAGGTACAGATTTTCATTTATAGCTCCCAGGTTTTAAACAATGTTGTGT  
TCACACGTCTAGATGATGTCATTCAGGTGCACAGACAGGAGGAGCTCCATCTT  
AAGCTTACACCATAAACTAAGACACATTCACATACATATTCGACACGAGGCT  
AGCTAAACCACCAACTCATCATAATTACACATAGTATTGACTGCACTGTGT

**Locus Cm07**, motif ATCT

>IH3P4PI01CJ6ML length=645 xy=0932\_3579 region=1 run=R\_2013\_10\_22\_16\_44\_39\_

AACTGTTTGAGTTCTGAGTTTTGGCATAATTTAGAGCAATAAATGATGTTTGTT  
ATATTTTAGTTATTTCTATCTATCTATCTATCTATCTATCTATCTATCTATC  
TATCTATCTATGTGTTTGTCTGTCTGAGCTTTGGTGATAAACACATTATCAGAGT  
GGCGATTACAGGACAGATCAAATGAACTTTGACGCAGAATGCCAGACACACAG  
GAGCCACGACACAAACATTAACCCTAATGAGCACGCAGTAGACTAATAACGT  
GACCATTATGCCAAACGAACTATTTCCAGACACAGATGTTTAAATGTGGTTACA  
AGTCAACTTTAATGCAAACCTCATCTCTAAACAGCACACAGGCTGCTCAGGCTCT  
ACTGTTTACCTGTCACCCAGCTGAGCTACTGAAGCTCACTACGAATCACCCGCT  
GCCCTTTAAATAAAAAGTCTTAACCAAAAAGCAAGAACAACCTTATTTGAACT  
ATATTCAGCCCAATGTGACACCACAACCTTTAATCACTAACTAAAGAAAGAAA  
GAACAGTGACATTATTTAATACACATGTATTGCTTTTTATGCCGTTATCGTAA  
ATCTTGACAATAACTTTGTCAGTATCGTGCTGCCAAAATAATTTGCACACT

**Locus Cm08**, motif AATAG (reverse complement: CTATT)

>IH3P4PI01CQ6MB length=657 xy=1012\_2481 region=1 run=R\_2013\_10\_22\_16\_44\_39\_

AAAGAACCAAAAATGTTAATGTTATTGCTGGTTAATTTACAGCATATCAAAAAA  
CAACCACATGACTGTCATTGTGGAGCACATTGTAGAGGTCATCTCAGCAGCTA  
ACAAATGAGTTGTATGTCTAATTACTTTTGCATGTGTTTGTATTGCCTTTATT  
AGAAGGACATCTGGAGGAGAAGGTAGTTCATATGTCTGCTATACTATTCTGCTT  
TCTGTTCTATTCTATTCTATTCTATTCTATTCTATTCTATTCTATTCTATCT  
TGTAGCTTTGATGCAGTCATGTTCCCTTAGCTGCTAACTGCCGTA AAAAGGAT  
TCTGTGGTAACACTAAACATTAAGCTGCTAACAAGTGTTTTTGTGTTGCATCTA

GTAAGAGCCACAAGCGTGCCTTTTCTTGCCTTTAGAGCTGTGATTACAGTTATT  
AGCTGCAGTTATTAGCTGTGGTTGTCTGTAATTAGTGCATTAAAGTGCACCTGT  
GTGAACACCTGGAATCTTTTAAATTGGGCACTAAGAAGAATGTGGAATCTGAG  
ACTGAACTCTCCATGTAAAACAAAACAAATAAAAAAAGTCTATGATTCACTA  
CAGCTAATTATTTGGTGAAGTCATGCTTTCCATAAATTTACATTTCTAATCACTG  
AAGCAGCA

**Locus Cm09**, motif AGAGC

>IH3P4PI01EI8Y7 length=320 xy=1742\_1441 region=1 run=R\_2013\_10\_22\_16\_44\_39\_

GCCAGAGCCTCTGACACAGCGCTGACTGTCCACCTCCACTTACAGTCAGATTAA  
AGGATGAACCCAGAGCAGAGCAGAGCAGAGCAGAGCAGAGCAGAGCAGAGG  
GATGTAGGACACGAGCAGATCCACAACCAGAGAGAGAGAGACAGAGAGAGAG  
AGACAGAGAGACAGAGAGAGAGAGAGAGACAGAGAGAGAGAGAAAGAGAGA  
GAGACAGAGAGAGAGAGACAGAGAGAGACAGAGAGAGACAGAGAGAGAGAG  
AGAGAGACAGGAAGAGAGAGAGAGACAGAGAGAGAGAGAAAGAGAGAGA  
GAGACAGAGA

**Locus Cm11**, motif ATT (reverse complement: AAT)

>IH3P4PI01CFV7C length=428 xy=0884\_0054 region=1 run=R\_2013\_10\_22\_16\_44\_39\_

TACACCTGCTAAGAAGCCCTGAACTGGAATTTAATGTTAGTTTGTCTGCACTC  
GTCTCTGTTGTTTTATTCATCCATTTTTCTCCATAAAAATGAATAGGATGAAG  
AAATTGAATTCTGTTTATTACACATCAATAATAATAATAATAATAATAATAAT  
AATAATAATAATAATAATAATAATAATAATAATAATAATAATAATAATAATAAT  
AAATCAGTGTGATTCAGTGT  
GATCAGTCTGCGTGTGGTTCAGTGTGCAAGTGAATTAATGTGAT  
TCAGTGTGATTCAGTGTAAATCAGTCTGAGTGTGATTCAGTGTGATTCAGTGTGA  
TCAGTCTGAGTGTGATTCAGTGTGATTCAGTGTGATTCAGTCTGAGTGTGATTC  
GTGTGATTCAGTGTGTCAGTCTGAGTGTGATTCAGTGTGATTCAGTGTAA

**Locus Cm12**, motif ATT

>IH3P4PI01D45N6 length=648 xy=1581\_3428 region=1 run=R\_2013\_10\_22\_16\_44\_39\_

AAGCATGCGGCTGGAGGGTTTACAGAGAACAATAAAGATCAGAGACAAAGAA  
AAACAGAGGAAGGAGGAACAGTGATGAAAGTGTGCACTCTTAGGGTGGGTTG  
CACCAACAACGAGTAAATTGAAGAAAGTTAGAGCAAATCAAGGTTTTATTTT  
GTTGCACCAGTTGCTTTTAAATATGGACTAACACATTTAGAGATTAAGAATTA  
ATCTAAGTTTAAAATTGAAAGCTGGATGGATTTGGCCGTATAAATAAACAGCC  
CTAACATTACTCACACTAGTGGAACGTGATGTGATGATATGTGATGATATGTGG  
CAATATATGATGCTATGTGATGTTTGTGAGAGGAGATGTGTGATGGTATATTA



ACTAGTCACACGTCACTCACTACACCCCGACTTTGTCTCTTGTGGTTAATTTTAT  
GTGTTTGAGATCACTCATGTTGTCTCATGTGGGTGTGTACAATGTCCAAAGCTA  
GCTAATTTAAAAGCATGAATTATTAATATTATTATTATTATTATTATTATTATT  
TTATTATTATTATTATTGCTTTTGTGGCTGACTTTATTAGCTGGTTAGCATCCAG  
GCTGAGCTAGCTAGCTATCGAGAGACCTAACTGTCCAGAGACACCAACTGTAT  
TTTTGGTATTTATTTTCACGCATCATCATATAAACTGGGAGAAGCAGGGACAGC  
CGCTAAGGTTAGGGTACAGAAAGCCTGTTGTTCTGGCAACATGTCAGCGGAG  
TGATACAGTTTTAGTGTGAAAATCTGTGCTGTAATCACGAATGTCAACACAGT  
TAGGATGCTTCTCAACCAATCAGATTGTGATGTCGGAACCTAACTCTTGTCTAAT  
ATGACTAACATGACAGGTTTTGCTTTATATTTTAGTTTTTGTACAAAATTGTGTA  
AAATGTGTAATAATTTACCTTTAAGTGATATACATTTTCAGAATATGACCACCT  
CCTAATATTTACAAACACTGTCCATTTTATTAAGTCC

**Locus Cm32**, motif ATT

>IH3P4PI01ESH27 length=426 xy=1847\_3073 region=1 run=R\_2013\_10\_22\_16\_44\_39\_

GTTCTGTTTACTCATATGGCTGAGATCAGATAAATTAGATAAATACACTGCTT  
CTAGGCCTGTCCAGGGTGTATCCTGCCTTCGGCCTAATGCAGGCTGAGATAAGA  
TAATTTGACAATGAACGGACACTGCTTCTAGACCATTATAGACCAAAAATAAG  
CTTATATTATTATTATTATTATTATTATTATTATTATTATTATTATTATTATT  
ATTCGTCATGGATAGGAATGTTTACTGAATGCAGGAGACATCAATATTCAGTC  
ATTCTTTAGCCAGATTTTCATGGACGGCCACAATTATACACTTAAAGGGGCTATA  
TGTCGAAATCTATTGTACTAAATCATAAAAATGTCTCTCAGAGAAATAAAGAA  
AACATGCTGAGCTGAAAAGCTTGTATTTCTTCTAACTGTGGTGGAGCC

**Locus Cm34**, motif TCGGG (reverse complement: CCCGA)

>IH3P4PI01ERH5I length=726 xy=1836\_1556 region=1 run=R\_2013\_10\_22\_16\_44\_39\_

GTGACGGGATTCGTAGATTGAGAAGAGGTGTTTCTTGCTATGCCGTACAGAC  
GGATGCCTTTGGAGACCCTAATGACCCTAAACGCTTCCATACACCTGCAAGTTC  
CCCAGAAATTGAGCCTGACCCTCTCCAGGCCCGTGCACGCTCTGTCCGAAACCCG  
ACCCGACCCGACCCGACCCGACCCGAACCCATAAACGGTCATTATGAGCCCGAT  
TTAAACCCAGGTTTTTTAACAGCAAGTAGAACGTAAACAGGCCTTTTTAACTC  
CGATGTCTGATTGTGCCCGGACTCTAGTCGACTCTCCAGCCCACAGCCTGTTA  
CTCTCCACCACGTTTAGCGCTCGTACTTCACGGGACGATAGCCGGACCGTTTCA  
CGCCCTCTCCGTGCGTCTAGTGTTCAAAAATAAAGGCCTATCACAGCCTCTCAC  
GCACACTGTAGCGCCACACTCCTGACTCTCCTCCACACTGAGCCAGAGGTACTC  
ACCGGACGTCATTCCTCTCCTCACTTCAGAAGCTCCACACGGCGCTGCAGGTTG  
TGTCATGTGGACCGAGGAGCTGATGTGTGTGTGCTGCAGGCCAGAGCTGTGTG  
ATTTAACACTCTGACGTGTGACTGGTTGCTATATGGTGATTAGAGTCCGAGGG

AAGTGGTGGGAATCTGGGCCCCGGCCCGNGTTGGCGTTGGGCATGGACTCGGGC  
AGAGAATCTAAACTCTACCTTCTTGACA

**Locus Cm35**, motif ATT (reverse complement: AAT)

>IH3P4PI01DI77X length=581 xy=1332\_0203 region=1 run=R\_2013\_10\_22\_16\_44\_39\_

GAGTCTGCAATCTGATGTATGATGACATCCAAACAGCTGTCTGGAGATAGAAA  
TACACATTCACCAAGGACTTTATTAGGAACACCTGTACACCTACTCATTTATGC  
AAGTATATAATCAGCAAATCATAACGGCTGGAGTGCAGTGCATAAAGTCATGTA  
CATAACAAGCAGCTTTCAGGTAATGCTTAATAGCCATTAGCAAAAGTGTGA  
CCTGGCATGCTTGATGGTGCCAAGCAGATTGGTTGAAGTATTTCTGTATCTGCT  
GATCTCTTGGGAGTTTCACGAACCCCTGTAATAATAATAATAATAATAAT  
ATAATAATAATAATAATAATAAACATCCAGTAAGCAACAATCCTGTGATGGAAA  
CACTTTATTAATAAGAGAAGCCAACAGAGAATGGCCAGACTTGTTCAGCTGT  
TAGAAGAACTAGAGCATCATAGAAAACATAACAAGGCTTGAGGTGAAT  
GGGATACAACAGCAACACTACATAATGTTCCCTGAGGCTGCAGTGGGCACAAGC  
TCACCAGAAATAAACAGCTGAAGACTGCAAAAACATAATCTGGTCAG

**Locus Cm36**, motif ATT (reverse complement: AAT)

>IH3P4PI01EXS6L length=583 xy=1908\_0875 region=1 run=R\_2013\_10\_22\_16\_44\_39\_

AAATGTTCAAGATTTTGCAATTTTATTCATTTATTAATACTTTTTTGTCAACTGG  
AAGGTTCAATTAAGACCATTATATTCACCCTCAATGTTAGTTAGCAAATACTAAA  
AGCAAACCTAAGTTAGCTGATAGCTACACACGTTATTTGTTATTTGTTTTGATA  
ATCAGTAGATTATTTGACTATGAAATAGTCTTGTGTTGCAGTCCTGTCTTGCAGAC  
ATCATTGTTGGCCCCGGATAATAATAATAATAATAATAATAATAATAATAATAAT  
ATAAATCCTCATTAATTTGGACTCCTAATAATCCGTCTTTTTTCTGGCACGTTAG  
ACTTTATTGAGCTGGATTCGTGCTTGGACCCCTTGTATTGTTGTCTTCCTGGATG  
TTAAACTTAGCAAATGAACAGTCATTTGTGCATCATCGCCTGTAGAACATGCAA  
ACGTATTTCTCCCTAAAAAAAATCATCTTATTTGACTTTGATGTTGGCTCCTTTT  
AATCGTGTCTTTGTAGTAACCGTTGCTCTTATTAGCTTCTGTAAAGAATAGAGC  
ATAAGAGCAAGAACCAGTGAAAATGTCCTCATTGAGTGA

**Locus Cm38**, motif ATCT (reverse complement: AGAT)

>IH3P4PI01C44GU length=304 xy=1171\_1612 region=1 run=R\_2013\_10\_22\_16\_44\_39\_

GCATCATGCATAAAAGTGCCCCAGATTTTGTACTTAACACTTCCTCTTGTCTGCT  
TAAGAATAGATAGATAGATAGATAGATAGATAGATAGATAGATAGATAGATA  
GATAGATAGATAGATAGATAGATAGATAGATAGATAGATAGATAGATAGATA  
GATAGATCAGGACATGACTCAGGTACCCTTGAGCAAGGCATCTAAGCTCCAAC



AGATAGATAGATAGATAGATAGATAGATAGATAGATAGATAGATAGATAGAA  
AGATGTGGATGCACTGCAGTAGCATGCCTCCAGATACCTGTGACAGCTTACTA  
GACCCTTATTAAGCCACTCCTTGTCCATCTAGATGCTGTCCGTGCTGCACACGG  
TGGTTGCTCTGGATATTAGCCGGTGGACTGGGTATCACTGCCACAAAACTTT  
GTATCTCTTT

**Locus Cm42**, motif AAC

>IH3P4PI01EBH28 length=653 xy=1654\_0450 region=1 run=R\_2013\_10\_22\_16\_44\_39\_  
GGCTAATGCTGATCACCTTTGATATCTGATTCCTGGAATATGCTGATGAAGGTA  
ATCTGGGTCAGCAGGAATCACTTATCACCCCTCAGTTACTGTACGTTCACTCT  
TATTACTACTCCGCCTTACTAACACACTCCTCCAGCTCGTTAGACACTTTCTT  
AATGCTTCAATAAATCTTCAATTAATAATCTTAATTAACACTTCTTAACCAGGA  
GCTCTAGATCAGTCACCGACGACACAACAACAACAACAACAACAACAACA  
CAACAACAACACACCATAACAGTCCTCATAACAGGCTGAGGGTCTTCCACCAAG  
ACCAAGCCACATGTCACACGGCTGCAAGGACCCCTAAATCCCCAGACCTGAGC  
CCAAGTACATCTGTGGGACCACCTCAATTATTGTGTTCACTCTATGGAGCCT  
CCTTACACCCCTCTAGAAGCTTTGGGATGCACTGCTGTCAGCATGGCTCCAGA  
AACCCGAGACAACCTACCAAGACCTTCATGAGTCACGCCAGCCATTCAGCT  
GCTGCACACAGATAAACTGTGTATGTATACTGTTTATCATGGATCTCTAGACT  
AGAACTCCATTTATACACTCAGTAGAGTCGTGTAGGTTCACTCGTGGTTCATAT  
ATACACTCA

**Locus Cm44**, motif ATAGT (reverse complement: ACTAT)

>IH3P4PI01EJRCG length=312 xy=1748\_0670 region=1 run=R\_2013\_10\_22\_16\_44\_39\_  
ATACTTATACTATACTACACTACACTACACTGTGTAATATTATTTAAGTAAAG  
GTTCTAAATGGTTCTTAGATTTGCATTACATACATTACATCATATTACACTTAT  
ACAAGGTGCCAGCTATTATCAGTTATCATTTAAAAGATTTTCATATTACTATATA  
CTATATTATATACTGTGTACTACACTATAACCATACTATTGTATACTATACTATAC  
TATACTATACTATACTATACTATGTCTAAATCTATTTAAAGTAAAGTGAAAAAG  
GAAATGTGCAGGATGCTCACAGGCTCTTCAACAGTAGGTG

**Locus Cm45**, motif ATT

>IH3P4PI01DULWP length=440 xy=1461\_2775 region=1 run=R\_2013\_10\_22\_16\_44\_39\_  
AAATGAATATAAGATCAGTGCAAACAAGTATAATTCCTTTGATATAAATATTA  
GTTAATTATCTTAACATTGAATTAATAAATGAGCTTAAGTGTATTTAATAAGGCTA  
ATCTTCTTTCAAGCTTAAAATGTTTATTTAAAATATGCTAATGATTTGCCAGTGT  
AATGAGAGGATCTGTCTGACTAAACTCAAACGAGTAAAATGTTTCTTGAAAT



TGTTTAAATATCTTAAAACAATTTAACNACATATTA ACTACATATTGACTTGCC  
ATTTACCAAGATATTAGTTTCTGTAGTGCATGTGTTTGTGGTATTATTTAAAATA  
T **ATTATTATTATTATTATTATTATTATTATTATT** ATATATATTATTAAGAATT  
TTGTTTTCTATTTATT **CGGCTGATTATAAGATTA**AAAACCATGTA AAATTGTAAC  
ATCGCT

**Locus Cm46**, motif ATT

>IH3P4PI01B4EKY length=232 xy=0753\_0576 region=1 run=R\_2013\_10\_22\_16\_44\_39\_  
ATAATGAATAATTATTAGGGTAGCACAGTGGCAGTGGTGTCTTAGATTTTCCTTA  
GATTGGGCCCAA **AAAATGGAGCCA**ACTTAGCCGTGCACATTCTGCCAACATTAA  
CTGTCATTATGAGC **ATTATTATTATTATTATTATTATTATTATTATTATTATT**  
ACCTGTATATAGTAGTATATATAGTAGGTAGTTTGGGTGATACAGTTGCTGTAT  
CACTGTA ACTGATAG

**Locus Cm47**, motif ATT (reverse complement: AAT)

>IH3P4PI01D1EFW length=348 xy=1539\_0202 region=1 run=R\_2013\_10\_22\_16\_44\_39\_  
GTACAGCCGCTACGTACCCGGATGGAGGAGTTTCCAGACACTATAGTTATGTG  
CTTCTGCATAGTCATCTGCAGCATA **GGAGTCTAACGGAGGGGAGCA**AGCTTAT  
CAAGGAGAT **AATAATAATAATAATAATAATAATAATAATAATAATAATAATA**AA  
ATAAAAAATGTTACAAATAATAATCGTTAAAATTAGACATTTATAATTATATAG  
TCAGCGGCCATTTTATTAGGTACTTGTGTGTACACCTTCTGCTCATTTTACCTT  
TTAGGTGCACTTTGTAGTTCTGCACTTACAGACTGTAGCAGTTCTGTTTCTCTGT  
ATACTTTATTACCTGTTGCTTTAA

**Locus Cm48**, motif ATT

>IH3P4PI01DAEJC length=451 xy=1231\_2182 region=1 run=R\_2013\_10\_22\_16\_44\_39\_  
GAATGTCTGATACCTGCTAGTTTAAATAGTATTTTAAATGATGTTCTGGCTCTAAA  
ATCATCGTGTATAACTCGTAG **GGATGGGTACAAACGAAGGGT**ATCGAAGGGTA  
CAAACGAACCAGAGTGCTGGAGTGAAAACACCCTAAGTTTATACTGTTATTTA  
GACGCCTTCGCTCAGCATGTTACATATGCAGAACATTTCTATATGATGTT **AATA**  
**ATAACAATAATAATAATAATAATAATAATAATAATAATAATAATAATAATAAT**GGG  
CAGCATGGTGGCGCACGGTAAACCACACCTGCACATATAAATAAGTTGTATCT  
TTAATAAGAGCTTCTCAGCAGCTGATCTGCAGGCTCTGTGTTTGTATGTGACTT  
ACGAGGCAGAGGCAGGAGGTGGTTGTGGTGTGGTTGTCTGTGTTGTGAGGTGG  
TGATAGTGTGTGTTGTGAGGTGGT
